# Supplementary material for: Houston GNSS Network for Subsidence and Faulting Monitoring: Data Analysis Methods and Products
Source: Atypon-hosted journal article supplement (doi:10.1061/(asce)su.1943-5428.0000399), 2022-06-25
Supplement: supplemental materials_su.1943-5428.0000399_wang.pdf [file supplemental%20materials_su.1943-5428.0000399_wang.pdf]

## SUPPLEMENTAL MATERIALS

*ASCE Journal of Surveying Engineering*

# Houston GNSS Network for Subsidence and Faulting Monitoring: Data Analysis Methods and Products

Guoquan Wang; Ashley Greuter; Christina M. Petersen;  
and Michael J. Turco

**DOI:** 10.1061/(ASCE)SU.1943-5428.0000399

© ASCE 2022

[www.ascelibrary.org](http://www.ascelibrary.org)

**Table S1. General Information of HoustonNet GNSS (as of October 2021)**

| GNSS | Location       |                | Observational History   |               |                   |               | Total Dis.*<br>Vertical<br>(cm) | Vertical Site Vel.<br>(mm/year) |               |       | Operator**  |
|------|----------------|----------------|-------------------------|---------------|-------------------|---------------|---------------------------------|---------------------------------|---------------|-------|-------------|
|      | Lon.<br>(Deg.) | Lat.<br>(Deg.) | Start<br>(Decimal Year) | End<br>(Year) | Windows<br>(Days) | 2001-<br>2010 |                                 | 2011-<br>2020                   | 2016-<br>2020 |       |             |
| ADKS | -95.586        | 29.791         | 1993.5                  | 2021.7        | 27.8              | 8183          | -1.41                           | 1                               | -1            | -0.2  | HGSD        |
| ALEF | -95.635        | 29.692         | 2014.3                  | 2021.7        | 7.5               | 2729          | -3.66                           | NAN                             | -6.9          | -5.5  | UH          |
| ALVN | -95.278        | 29.401         | 2012.5                  | 2017.2        | 4.8               | 1714          | -1.83                           | NAN                             | -3.1          | NAN   | SmartNet    |
| ANG5 | -95.485        | 29.301         | 2003.4                  | 2019.5        | 16.1              | 5148          | -4.35                           | -2.6                            | -2.2          | -1.8  | USCG        |
| ANG6 | -95.485        | 29.302         | 2003.4                  | 2019.5        | 16.1              | 5260          | -3.90                           | -2.4                            | -1.7          | -1.2  | USCG        |
| AULT | -95.745        | 29.998         | 2015.6                  | 2021.7        | 6.2               | 2188          | -6.79                           | NAN                             | -10.4         | -10.6 | UH          |
| CFHS | -95.632        | 29.919         | 2015.6                  | 2021.7        | 6.1               | 2187          | -8.71                           | NAN                             | -14.4         | -14.3 | UH          |
| CFJV | -95.556        | 29.882         | 2015.8                  | 2021.7        | 6.0               | 2175          | -4.86                           | NAN                             | -8.4          | -8.2  | UH          |
| CMFB | -95.729        | 29.681         | 2014.4                  | 2021.7        | 7.3               | 2641          | -3.50                           | NAN                             | -4.8          | -4.6  | UH          |
| COH1 | -95.543        | 29.670         | 2009.0                  | 2017.7        | 8.7               | 2734          | -3.23                           | NAN                             | -1.8          | NAN   | COH         |
| COH2 | -95.412        | 29.629         | 2009.0                  | 2021.7        | 12.7              | 4148          | -1.65                           | NAN                             | -0.5          | -1.5  | COH         |
| COH3 | -95.263        | 29.643         | 2004.2                  | 2008.9        | 4.6               | 913           | 0.52                            | 2.9                             | NAN           | NAN   | COH         |
| COH4 | -95.215        | 29.783         | 2009.0                  | 2011.7        | 2.7               | 739           | 0.54                            | 3                               | NAN           | NAN   | COH         |
| COH5 | -95.275        | 29.845         | 2004.3                  | 2007.3        | 3.0               | 633           | 0.46                            | 1.4                             | NAN           | NAN   | COH         |
| COH6 | -95.185        | 30.040         | 2004.2                  | 2021.6        | 17.4              | 3133          | -4.08                           | -5.4                            | -5            | NAN   | COH&HGSD    |
| COH7 | -95.497        | 29.877         | 2004.2                  | 2008.8        | 4.5               | 850           | -2.62                           | -8                              | NAN           | NAN   | COH&HGSD    |
| COTM | -94.998        | 29.394         | 2015.1                  | 2021.2        | 6.1               | 2220          | -1.34                           | NAN                             | -2.6          | -2.1  | UH          |
| CSTA | -95.512        | 29.796         | 2013.1                  | 2015.3        | 2.2               | 751           | 0.08                            | NAN                             | 0.1           | NAN   | UH          |
| CSTE | -95.511        | 29.796         | 2015.4                  | 2021.7        | 6.3               | 2200          | -2.55                           | NAN                             | -6.5          | -6.5  | UH          |
| DEN1 | -95.258        | 29.510         | 2011.8                  | 2021.7        | 9.9               | 3152          | -1.98                           | NAN                             | -2.8          | -2.6  | USF         |
| DEN2 | -95.254        | 29.505         | 2011.8                  | 2021.7        | 9.9               | 2261          | -0.49                           | NAN                             | -1            | -0.9  | USF         |
| DEN3 | -95.255        | 29.494         | 2011.8                  | 2019.7        | 7.9               | 2679          | -0.32                           | NAN                             | -1.3          | -0.3  | USF         |
| DEN4 | -95.230        | 29.500         | 2015.8                  | 2021.7        | 5.9               | 1646          | -0.83                           | NAN                             | -0.9          | -0.9  | USF         |
| DISD | -95.740        | 29.289         | 2015.5                  | 2021.7        | 6.3               | 2142          | 0.60                            | NAN                             | 0.8           | 1.1   | UH          |
| DMFB | -95.584        | 29.623         | 2014.8                  | 2021.7        | 7.0               | 2543          | -3.40                           | NAN                             | -5.9          | -4.9  | UH          |
| DWI1 | -95.404        | 29.014         | 2009.4                  | 2021.7        | 12.3              | 4126          | -2.47                           | NAN                             | -1.1          | 0.2   | SmartNet    |
| FSFB | -95.630        | 29.556         | 2014.4                  | 2021.7        | 7.4               | 2560          | -0.99                           | NAN                             | -1.4          | -1.7  | UH          |
| GAL1 | -94.737        | 29.330         | 1995.7                  | 2003.5        | 7.8               | 2736          | -2.42                           | -3.8                            | NAN           | NAN   | USCG        |
| GAL2 | -94.737        | 29.330         | 1997.7                  | 2003.1        | 5.4               | 480           | -0.96                           | -2.3                            | NAN           | NAN   | USCG        |
| GAL7 | -94.737        | 29.330         | 1996.0                  | 2003.5        | 7.5               | 2678          | -2.70                           | -3.7                            | NAN           | NAN   | USCG        |
| GSEC | -95.528        | 30.197         | 2015.8                  | 2021.7        | 6.0               | 2183          | -3.60                           | NAN                             | -7.5          | -7.3  | UH          |
| HCC1 | -95.561        | 29.788         | 2012.9                  | 2021.7        | 8.8               | 3211          | -5.65                           | NAN                             | -6.9          | -4.8  | UH          |
| HCC2 | -95.562        | 29.788         | 2013.1                  | 2021.7        | 8.5               | 2767          | -6.26                           | NAN                             | -7.5          | -5    | UH          |
| HOUS | -95.433        | 29.779         | 1996.0                  | 2003.0        | 7.0               | 1432          | -3.45                           | -7.2                            | NAN           | NAN   | HGSD        |
| HOUX | -95.435        | 29.780         | 2010.3                  | 2014.0        | 3.7               | 824           | -0.23                           | NAN                             | -0.4          | NAN   | HGSD        |
| HPEK | -95.716        | 29.755         | 2014.4                  | 2021.7        | 7.3               | 1774          | -9.08                           | NAN                             | -12.6         | -12.4 | UH          |
| HSMN | -95.470        | 29.800         | 2013.3                  | 2021.7        | 8.4               | 3075          | -2.89                           | NAN                             | -4.4          | -3    | UH          |
| JGS2 | -94.891        | 30.045         | 2012.5                  | 2021.7        | 9.3               | 3114          | -1.95                           | NAN                             | -2.2          | -1.1  | SmartNet    |
| KKES | -95.595        | 29.850         | 2015.6                  | 2021.7        | 6.1               | 2155          | -7.88                           | NAN                             | -11.8         | -11.6 | UH          |
| KPCD | -95.924        | 29.926         | 2016.4                  | 2021.6        | 5.2               | 1839          | -2.24                           | NAN                             | -4.4          | -4.4  | UH          |
| KPCS | -95.924        | 29.926         | 2016.4                  | 2021.6        | 5.2               | 1627          | -1.63                           | NAN                             | -3.9          | -3.9  | UH          |
| LCBR | -96.602        | 30.182         | 2010.5                  | 2021.7        | 11.2              | 2474          | -1.18                           | NAN                             | -1.8          | -0.5  | LCRA        |
| LCI1 | -95.443        | 29.807         | 2012.5                  | 2021.7        | 9.3               | 2944          | -2.64                           | NAN                             | -2.8          | -1    | SmartNet&UH |
| LDBT | -96.779        | 30.089         | 2003.2                  | 2009.7        | 6.5               | 2069          | -1.5                            | -0.4                            | NAN           | NAN   | NOAA        |
| LGC1 | -94.075        | 30.045         | 2013.5                  | 2020.5        | 7.0               | 2558          | -0.18                           | NAN                             | -1.1          | -0.1  | UH          |
| LKHU | -95.146        | 29.913         | 1994.8                  | 2021.7        | 26.4              | 9100          | 1.96                            | 1.7                             | 0.4           | 0.6   | HGSD        |
| MDWD | -95.595        | 29.771         | 2013.3                  | 2021.7        | 8.4               | 3040          | -6.18                           | NAN                             | -6.4          | -6    | UH          |

|      |         |        |        |        |      |      |        |       |       |       |          |
|------|---------|--------|--------|--------|------|------|--------|-------|-------|-------|----------|
| ME01 | -95.276 | 29.608 | 2015.5 | 2017.7 | 2.2  | 791  | -0.39  | NAN   | -0.3  | NAN   | UH       |
| MEPD | -95.240 | 29.658 | 2014.0 | 2021.7 | 7.7  | 2809 | 1.14   | NAN   | 0.9   | 0.9   | UH       |
| MRHK | -95.745 | 29.804 | 2014.4 | 2021.7 | 7.3  | 2588 | -12.45 | NAN   | -16.6 | -16.6 | UH       |
| N301 | -94.792 | 29.311 | 2018.5 | 2021.7 | 3.2  | 1075 | -1.66  | NAN   | -3.2  | -3.2  | NOAA     |
| NASA | -95.096 | 29.552 | 2014.2 | 2021.6 | 7.4  | 2551 | -0.10  | NAN   | -0.7  | 0.1   | UH       |
| NBRY | -96.467 | 30.666 | 2012.5 | 2021.3 | 8.9  | 3149 | -1.77  | NAN   | -1.1  | -1.1  | SmartNet |
| NETP | -95.334 | 29.791 | 1993.5 | 2021.7 | 27.8 | 8200 | 1.05   | 0.8   | 0.8   | 1.6   | HGSD     |
| OKEK | -95.803 | 29.725 | 2014.6 | 2021.7 | 7.2  | 2547 | -5.78  | NAN   | -9    | -9.6  | UH       |
| P000 | -95.152 | 29.539 | 1996.0 | 2021.6 | 25.6 | 1640 | -1.54  | 0.8   | -1.6  | -0.1  | HGSD     |
| P001 | -95.617 | 29.912 | 1994.2 | 2021.7 | 27.5 | 2106 | -71.06 | -27.5 | -15.1 | -13.2 | HGSD     |
| P002 | -95.416 | 30.001 | 1994.3 | 2021.7 | 27.4 | 2098 | -63.90 | -27.1 | -14.8 | -7    | HGSD     |
| P003 | -95.613 | 29.821 | 1994.3 | 2021.6 | 27.3 | 1676 | -54.67 | -19.8 | -9    | -3.1  | HGSD     |
| P004 | -95.597 | 29.630 | 1994.7 | 2021.6 | 27.0 | 1973 | -27.60 | -15.6 | -3.3  | -5.8  | FBSD     |
| P005 | -95.586 | 29.791 | 1996.7 | 2021.6 | 24.9 | 1658 | -30.53 | -10.5 | -7.1  | 1.1   | HGSD     |
| P006 | -95.672 | 29.819 | 2014.3 | 2021.6 | 7.3  | 356  | -9.60  | NAN   | -17.2 | -16.2 | HGSD     |
| P007 | -95.577 | 29.936 | 1999.1 | 2021.6 | 22.5 | 1357 | -58.95 | -36.7 | -17.2 | -14.4 | HGSD     |
| P008 | -95.476 | 29.980 | 1999.6 | 2021.7 | 22.1 | 1344 | -39.52 | -25.5 | -10.3 | -7.1  | HGSD     |
| P009 | -95.071 | 30.038 | 1999.3 | 2021.6 | 22.2 | 1410 | -3.21  | -1.8  | -2.4  | -1.5  | HGSD     |
| P010 | -95.799 | 29.566 | 1999.3 | 2021.6 | 22.3 | 1665 | -7.85  | -4.2  | -3.3  | -1.4  | FBSD     |
| P011 | -95.865 | 30.032 | 1999.3 | 2021.7 | 22.4 | 1486 | -10.39 | -5.3  | -4.5  | -3.7  | HGSD     |
| P012 | -95.263 | 30.060 | 2000.9 | 2021.5 | 20.6 | 1358 | -12.38 | -6.9  | -5.8  | -5.2  | HGSD     |
| P013 | -95.490 | 30.195 | 2000.9 | 2021.7 | 20.8 | 1291 | -25.29 | -17   | -7.8  | -7.6  | HGSD     |
| P014 | -95.644 | 29.474 | 2000.9 | 2021.6 | 20.7 | 1191 | -5.08  | -6.3  | 0.3   | 0     | FBSD     |
| P016 | -95.527 | 29.544 | 2000.9 | 2021.6 | 20.8 | 1256 | -4.89  | -8.6  | 0.3   | 2.7   | FBSD     |
| P017 | -95.615 | 30.091 | 2000.9 | 2021.5 | 20.6 | 1206 | -34.27 | -19.4 | -16.9 | -10.8 | HGSD     |
| P018 | -95.678 | 29.965 | 2000.9 | 2021.6 | 20.8 | 1211 | -34.68 | -21.4 | -15   | -11.8 | HGSD     |
| P019 | -95.805 | 29.841 | 2000.9 | 2021.6 | 20.7 | 1132 | -21.07 | -8.3  | -12.4 | -9.5  | HGSD     |
| P020 | -95.013 | 29.533 | 2002.0 | 2021.6 | 19.6 | 1184 | -0.75  | 1     | -2    | -0.2  | HGSD     |
| P021 | -95.312 | 29.545 | 2002.2 | 2021.4 | 19.2 | 1125 | -3.15  | -4    | -3.2  | -2.5  | HGSD     |
| P022 | -95.021 | 29.335 | 2002.0 | 2021.6 | 19.6 | 1139 | -4.80  | -3.2  | -3.4  | -2.5  | HGSD     |
| P023 | -94.918 | 29.335 | 2002.1 | 2021.6 | 19.6 | 1208 | 1.65   | 1.2   | -0.3  | 1.3   | HGSD     |
| P024 | -95.041 | 29.669 | 2002.1 | 2021.7 | 19.6 | 1174 | 3.57   | 2.5   | 0.1   | 2     | HGSD     |
| P026 | -94.938 | 29.210 | 2002.2 | 2021.7 | 19.5 | 2451 | -0.98  | -0.3  | -1.5  | -0.8  | HGSD     |
| P027 | -95.016 | 29.583 | 2002.4 | 2021.7 | 19.3 | 1145 | -4.79  | -3.3  | -3.7  | -1.6  | HGSD     |
| P028 | -94.918 | 29.751 | 2002.2 | 2021.7 | 19.5 | 1128 | 1.17   | 1.7   | -0.9  | 0.5   | HGSD     |
| P029 | -95.822 | 29.769 | 2007.3 | 2021.7 | 14.3 | 659  | -23.17 | -17.5 | -16.1 | -20.3 | FBSD     |
| P030 | -95.902 | 29.689 | 2007.4 | 2021.7 | 14.3 | 641  | -5.41  | -6    | -5.5  | -5.7  | FBSD     |
| P031 | -95.848 | 29.398 | 2007.4 | 2021.6 | 14.2 | 643  | 2.13   | 3.7   | 0.7   | -2.6  | FBSD     |
| P032 | -95.707 | 29.541 | 2007.4 | 2021.6 | 14.2 | 648  | 0.14   | -1    | -0.4  | 0.7   | FBSD     |
| P033 | -95.224 | 29.490 | 2006.3 | 2021.7 | 15.4 | 805  | -1.39  | -0.2  | -1.7  | -0.4  | HGSD     |
| P034 | -95.042 | 29.422 | 2010.4 | 2021.7 | 11.4 | 3983 | -3.44  | -5    | -3.1  | -2    | HGSD     |
| P035 | -95.082 | 29.473 | 2006.6 | 2021.6 | 14.9 | 666  | 2.08   | 1     | 0.7   | 0.5   | HGSD     |
| P036 | -94.942 | 29.494 | 2007.0 | 2021.6 | 14.7 | 693  | -1.22  | -3    | -2.6  | -2    | HGSD     |
| P037 | -95.101 | 29.631 | 2007.4 | 2021.7 | 14.3 | 728  | 4.64   | 2     | 2.1   | 2.1   | HGSD     |
| P038 | -95.223 | 29.649 | 2007.4 | 2021.7 | 14.4 | 732  | 3.61   | 1     | 0.3   | 0.9   | HGSD     |
| P039 | -95.339 | 29.645 | 2011.1 | 2021.7 | 10.6 | 529  | -0.77  | 1     | 0.7   | 0.5   | HGSD     |
| P040 | -95.463 | 29.493 | 2007.4 | 2021.6 | 14.3 | 590  | -8.03  | -6    | -5.7  | -5.9  | FBSD     |
| P041 | -95.476 | 29.662 | 2007.3 | 2021.6 | 14.3 | 723  | -4.84  | -9    | -8.7  | -8    | HGSD     |
| P042 | -95.635 | 29.732 | 2007.3 | 2021.6 | 14.3 | 660  | -7.61  | -9    | -8.6  | -7.6  | HGSD     |
| P043 | -95.111 | 29.093 | 2006.5 | 2021.7 | 15.2 | 2150 | -0.62  | -1    | -1.1  | 0.6   | HGSD     |
| P044 | -95.687 | 29.880 | 2007.3 | 2021.6 | 14.3 | 664  | -16.84 | -15   | -14.1 | -12   | HGSD     |
| P045 | -95.385 | 29.876 | 2007.3 | 2021.7 | 14.3 | 696  | -4.65  | -5    | -4.7  | -3    | HGSD     |
| P046 | -95.600 | 30.030 | 2007.3 | 2021.7 | 14.4 | 693  | -21.79 | -18   | -16   | -13.7 | HGSD     |
| P047 | -95.424 | 30.090 | 2007.3 | 2021.7 | 14.4 | 675  | -24.60 | -17   | -14.1 | -13.2 | HGSD     |

|      |         |        |        |        |      |      |         |      |       |       |       |
|------|---------|--------|--------|--------|------|------|---------|------|-------|-------|-------|
| P048 | -95.672 | 30.045 | 2007.3 | 2021.7 | 14.4 | 668  | -15.49  | -15  | -13.8 | -7.1  | HGSD  |
| P049 | -94.702 | 29.422 | 2006.3 | 2021.7 | 15.4 | 1852 | -1.96   | -1   | -3.4  | -2    | HGSD  |
| P050 | -94.856 | 29.848 | 2006.8 | 2021.7 | 14.8 | 739  | -1.16   | -1   | -2.3  | -1    | HGSD  |
| P051 | -95.284 | 29.933 | 2007.3 | 2021.6 | 14.3 | 686  | -8.77   | -8.5 | -6.2  | 1.8   | HGSD  |
| P052 | -95.177 | 29.852 | 2007.3 | 2021.6 | 14.3 | 672  | -0.01   | 2.8  | -1.1  | 1     | HGSD  |
| P053 | -95.057 | 29.908 | 2007.3 | 2021.7 | 14.4 | 637  | -1.01   | -0.7 | -2.5  | -1    | HGSD  |
| P054 | -95.034 | 29.801 | 2006.8 | 2021.7 | 14.9 | 740  | -0.36   | -2   | -1.2  | 0.2   | HGSD  |
| P055 | -95.177 | 29.794 | 2006.8 | 2021.6 | 14.8 | 710  | 3.22    | 1    | 1.5   | 1.5   | HGSD  |
| P056 | -95.817 | 29.903 | 2007.3 | 2021.6 | 14.2 | 613  | -7.91   | -0.8 | -7    | -10.1 | HGSD  |
| P057 | -95.722 | 29.684 | 2009.1 | 2021.6 | 12.5 | 547  | -3.52   | -3   | -4.3  | -2.8  | FBSD  |
| P058 | -95.715 | 29.485 | 2010.6 | 2021.6 | 11.0 | 501  | -2.05   | NAN  | -2.1  | -1.4  | FBSD  |
| P059 | -95.740 | 29.617 | 2010.6 | 2021.7 | 11.1 | 507  | -2.73   | NAN  | -2.9  | -1.7  | FBSD  |
| P060 | -95.820 | 29.686 | 2012.1 | 2021.7 | 9.6  | 401  | -4.54   | NAN  | -6    | -4.1  | FBSD  |
| P061 | -95.972 | 29.675 | 2011.1 | 2021.7 | 10.6 | 502  | -4.20   | NAN  | -2.4  | -1.3  | FBSD  |
| P062 | -95.974 | 29.593 | 2011.1 | 2021.6 | 10.4 | 446  | -3.83   | NAN  | -4.1  | -3.8  | FBSD  |
| P063 | -95.547 | 29.508 | 2011.4 | 2021.6 | 10.2 | 479  | -0.61   | NAN  | -1.8  | 0.7   | FBSD  |
| P065 | -95.107 | 30.106 | 2012.4 | 2021.7 | 9.3  | 425  | -8.95   | NAN  | -9.2  | -8.7  | HGSD  |
| P066 | -95.767 | 30.017 | 2011.2 | 2021.7 | 10.5 | 506  | -14.29  | NAN  | -12.8 | -12.4 | HGSD  |
| P067 | -95.855 | 29.532 | 2011.1 | 2021.7 | 10.6 | 477  | -2.51   | NAN  | -2.7  | -1.4  | FBSD  |
| P068 | -95.587 | 30.185 | 2011.8 | 2021.6 | 9.8  | 575  | -9.54   | NAN  | -9.4  | -8.7  | LSGCD |
| P069 | -95.459 | 30.199 | 2011.7 | 2021.6 | 9.9  | 585  | -11.19  | NAN  | -10.5 | -9.8  | LSGCD |
| P070 | -95.424 | 30.291 | 2011.8 | 2021.7 | 9.9  | 526  | -4.07   | NAN  | -4.7  | -2.7  | LSGCD |
| P071 | -95.579 | 30.353 | 2011.8 | 2021.7 | 9.9  | 590  | -3.87   | NAN  | -3.5  | -2.5  | LSGCD |
| P072 | -95.242 | 30.147 | 2012.0 | 2021.7 | 9.7  | 431  | -8.49   | NAN  | -7.7  | -11.3 | LSGCD |
| P073 | -95.730 | 30.193 | 2012.1 | 2021.7 | 9.7  | 609  | -7.55   | NAN  | -7.9  | -7.2  | LSGCD |
| P074 | -95.231 | 29.736 | 2012.0 | 2021.5 | 9.5  | 464  | -0.64   | NAN  | 2.3   | 1     | HGSD  |
| P075 | -95.031 | 29.758 | 2012.4 | 2021.7 | 9.3  | 458  | -2.43   | NAN  | -0.8  | -1    | HGSD  |
| P076 | -95.045 | 29.361 | 2012.6 | 2021.6 | 9.0  | 407  | -4.59   | NAN  | -4.8  | -3    | HGSD  |
| P077 | -95.850 | 29.979 | 2013.2 | 2021.4 | 8.2  | 408  | -6.04   | NAN  | -7.7  | -5    | HGSD  |
| P078 | -96.016 | 29.739 | 2014.3 | 2021.7 | 7.4  | 360  | -3.22   | NAN  | -3.5  | -1.5  | FBSD  |
| P079 | -95.471 | 29.035 | 2014.8 | 2021.6 | 6.8  | 1723 | -0.88   | NAN  | -0.7  | -0.7  | BWA   |
| P080 | -95.165 | 29.578 | 2014.9 | 2021.7 | 6.8  | 2340 | 0.84    | NAN  | 0.9   | 1.2   | HGSD  |
| P081 | -95.170 | 29.556 | 2014.9 | 2021.7 | 6.8  | 2346 | -0.03   | NAN  | 0     | 0.2   | HGSD  |
| P082 | -95.731 | 29.296 | 2016.1 | 2021.4 | 5.3  | 230  | 0.72    | NAN  | 1.6   | 1.6   | BCGCD |
| P083 | -95.182 | 29.262 | 2016.0 | 2021.0 | 5.0  | 210  | -1.19   | NAN  | -2.8  | -2.8  | BCGCD |
| P084 | -95.370 | 29.297 | 2016.1 | 2021.7 | 5.6  | 252  | 2.56    | NAN  | 4.7   | 4.7   | BCGCD |
| P085 | -95.278 | 29.343 | 2016.0 | 2021.7 | 5.6  | 227  | 0.22    | NAN  | -0.4  | -0.4  | BCGCD |
| P086 | -95.458 | 29.258 | 2016.1 | 2021.2 | 5.1  | 204  | 1.90    | NAN  | 1.4   | 1.4   | BCGCD |
| P087 | -95.677 | 29.058 | 2016.1 | 2021.6 | 5.5  | 227  | -0.02   | NAN  | 0.3   | 0.3   | BCGCD |
| P088 | -95.438 | 29.446 | 2016.1 | 2021.1 | 5.0  | 230  | -0.41   | NAN  | -3.4  | -3.4  | BCGCD |
| P089 | -95.799 | 29.566 | 2015.8 | 2021.5 | 5.8  | 266  | -0.06   | NAN  | -0.7  | -0.7  | FBSD  |
| P090 | -95.160 | 29.710 | 2016.0 | 2021.7 | 5.7  | 383  | 2.81    | NAN  | 1     | 0.8   | HGSD  |
| P091 | -95.493 | 29.783 | 2016.3 | 2021.7 | 5.4  | 373  | -2.53   | NAN  | -6.3  | -6.3  | HGSD  |
| P092 | -95.501 | 29.881 | 2016.3 | 2021.7 | 5.4  | 339  | -2.62   | NAN  | -4.2  | -4.2  | HGSD  |
| P093 | -95.197 | 29.417 | 2017.2 | 2021.6 | 4.4  | 240  | -0.67   | NAN  | 3.7   | 3.7   | HGSD  |
| P094 | -95.524 | 29.722 | 2017.3 | 2021.6 | 4.3  | 305  | -1.33   | NAN  | -2.6  | -2.6  | HGSD  |
| P095 | -95.294 | 29.808 | 2017.2 | 2021.7 | 4.5  | 313  | -0.05   | NAN  | 0.8   | 0.8   | HGSD  |
| P096 | -95.748 | 29.724 | 2017.6 | 2021.7 | 4.0  | 1386 | 1.59    | NAN  | -2.6  | -2.6  | FBSD  |
| P097 | -95.847 | 29.785 | 2018.1 | 2021.6 | 3.5  | 236  | -8.88   | NAN  | -31   | -31   | HGSD  |
| P098 | -95.820 | 29.803 | 2018.1 | 2021.6 | 3.5  | 234  | -6.24   | NAN  | -22.2 | -22.2 | HGSD  |
| P099 | -95.579 | 29.986 | 2018.1 | 2021.7 | 3.5  | 239  | -3.05   | NAN  | -9.7  | -9.7  | HGSD  |
| P100 | -95.198 | 29.934 | 2019.3 | 2021.6 | 2.3  | 162  | 0.18    | NAN  | NAN   | NAN   | HGSD  |
| P101 | -95.378 | 28.945 | 2019.7 | 2021.5 | 1.8  | 64   | 0.55    | NAN  | NAN   | NAN   | BCGCD |
| P102 | -95.641 | 29.149 | 2019.6 | 2021.4 | 1.8  | 74   | -106.07 | NAN  | NAN   | NAN   | BCGCD |

|      |         |        |        |        |      |      |        |       |       |       |             |
|------|---------|--------|--------|--------|------|------|--------|-------|-------|-------|-------------|
| P103 | -95.311 | 29.151 | 2019.7 | 2021.7 | 2.0  | 56   | -0.37  | NAN   | NAN   | NAN   | BCGCD       |
| P104 | -95.421 | 29.370 | 2020.0 | 2021.6 | 1.6  | 30   | 0.00   | NAN   | NAN   | NAN   | BCGCD       |
| P105 | -95.416 | 29.492 | 2019.7 | 2021.6 | 1.9  | 88   | -0.45  | NAN   | NAN   | NAN   | BCGCD       |
| P106 | -95.400 | 29.552 | 2019.7 | 2021.3 | 1.6  | 93   | -0.68  | NAN   | NAN   | NAN   | BCGCD       |
| P107 | -95.459 | 29.157 | 2019.6 | 2021.7 | 2.1  | 86   | 5.23   | NAN   | NAN   | NAN   | BCGCD       |
| P108 | -95.121 | 29.772 | 2021.2 | 2021.6 | 0.4  | 32   | 0.21   | NAN   | NAN   | NAN   | HGSD        |
| P109 | -95.022 | 29.986 | 2021.1 | 2021.7 | 0.6  | 41   | -0.28  | NAN   | NAN   | NAN   | HGSD        |
| P110 | -95.443 | 29.548 | 2021.2 | 2021.6 | 0.4  | 30   | 0.00   | NAN   | NAN   | NAN   | FBSD        |
| P111 | -95.873 | 29.733 | 2021.3 | 2021.7 | 0.4  | 21   | 0.00   | NAN   | NAN   | NAN   | FBSD        |
| PA06 | -95.678 | 29.816 | 1997.6 | 2014.3 | 16.6 | 1134 | -38.70 | -23.3 | -12.9 | NAN   | HGSD        |
| PWES | -95.511 | 30.199 | 2015.2 | 2021.7 | 6.5  | 2380 | -7.16  | NAN   | -8.9  | -9.4  | UH          |
| RDCT | -95.495 | 29.810 | 2013.6 | 2021.7 | 8.2  | 2744 | -2.55  | NAN   | -4.5  | -3    | UH          |
| ROD1 | -95.527 | 30.072 | 2007.0 | 2021.7 | 14.7 | 5082 | -16.14 | -18.4 | -8.7  | -6.7  | RODS        |
| RPFB | -95.514 | 29.484 | 2014.8 | 2021.7 | 7.0  | 2542 | -0.59  | NAN   | -1.3  | -1    | UH          |
| SESG | -95.430 | 29.987 | 2014.7 | 2021.7 | 7.1  | 2575 | -6.40  | NAN   | -9.1  | -8.6  | UH          |
| SG32 | -96.359 | 30.602 | 2003.2 | 2014.1 | 10.9 | 3963 | -0.93  | -0.3  | 0.5   | NAN   | TXAM        |
| SHSG | -95.430 | 30.054 | 2014.7 | 2021.7 | 7.0  | 2561 | -8.09  | NAN   | -11.2 | -11   | UH          |
| SISD | -96.174 | 29.762 | 2015.2 | 2021.7 | 6.6  | 2305 | -0.81  | NAN   | -1.7  | -1.4  | UH          |
| SPBH | -95.515 | 29.802 | 2013.3 | 2021.7 | 8.4  | 3078 | -4.22  | NAN   | -4.9  | -3.6  | UH          |
| TDAM | -94.817 | 29.314 | 2013.4 | 2021.7 | 8.3  | 2801 | -2.54  | NAN   | -2.6  | -1.6  | UH          |
| THSU | -95.340 | 29.714 | 2013.0 | 2021.7 | 8.8  | 2916 | 0.21   | NAN   | 0.4   | 0.6   | UH          |
| TMCC | -95.395 | 29.702 | 2003.3 | 2021.7 | 18.4 | 4442 | -1.09  | -1.5  | -1.5  | -0.8  | HGSD        |
| TSFT | -95.480 | 29.806 | 2013.4 | 2021.7 | 8.4  | 3005 | -4.08  | NAN   | -4.6  | -2.5  | UH          |
| TXAC | -94.671 | 29.778 | 2011.1 | 2021.7 | 10.6 | 3818 | 1.47   | NAN   | -0.3  | -0.1  | TxDOT       |
| TXAG | -95.419 | 29.164 | 2005.6 | 2020.6 | 15.0 | 5422 | -1.67  | -1.9  | -0.5  | -1    | TxDOT       |
| TXAV | -95.242 | 29.403 | 2017.1 | 2021.7 | 4.6  | 1218 | -0.89  | NAN   | -2.6  | -2.6  | SmartNet    |
| TXB1 | -94.181 | 30.161 | 2013.2 | 2021.7 | 8.5  | 2823 | 0.68   | NAN   | -1    | 0.5   | TxDOT       |
| TXB2 | -94.192 | 30.090 | 2012.5 | 2021.7 | 9.3  | 3042 | -9.91  | NAN   | -8.9  | -4.6  | TxDOT       |
| TXB6 | -94.937 | 29.757 | 2012.5 | 2018.2 | 5.8  | 2054 | -1.27  | NAN   | -1.8  | -1.5  | TxDOT       |
| TXBC | -95.972 | 29.000 | 2009.4 | 2021.7 | 12.3 | 4434 | -2.53  | -0.4  | -1.6  | -1.7  | TxDOT       |
| TXBH | -95.946 | 29.786 | 2017.2 | 2021.7 | 4.6  | 1626 | -2.08  | NAN   | -4.1  | -4.1  | SmartNet    |
| TXBM | -94.180 | 30.162 | 1996.1 | 2013.8 | 17.7 | 5928 | -4.17  | -1.3  | -1.1  | NAN   | TxDOT       |
| TXBY | -96.371 | 30.686 | 2005.1 | 2012.4 | 7.3  | 2488 | -0.35  | -0.7  | NAN   | NAN   | TxDOT       |
| TXC5 | -96.573 | 29.704 | 2017.2 | 2021.7 | 4.5  | 1613 | -0.38  | NAN   | -0.5  | -0.5  | SmartNet    |
| TXCF | -96.573 | 29.704 | 2017.1 | 2021.7 | 4.7  | 1657 | -0.10  | NAN   | -0.4  | -0.4  | SmartNet&UH |
| TXCM | -96.577 | 29.703 | 2010.4 | 2021.7 | 11.3 | 4089 | 0.22   | NAN   | -1.2  | 0.5   | TxDOT       |
| TXCN | -95.441 | 30.349 | 2005.6 | 2021.7 | 16.2 | 5881 | -16.11 | -13.3 | -10.2 | -5.3  | TxDOT       |
| TXCV | -95.094 | 30.335 | 2012.7 | 2021.5 | 8.8  | 2936 | -3.81  | NAN   | -4.6  | -3.7  | SmartNet    |
| TXCY | -95.626 | 30.096 | 2017.4 | 2021.7 | 4.3  | 1421 | -5.00  | NAN   | -11.2 | -11.2 | SmartNet    |
| TXED | -96.634 | 28.968 | 2009.4 | 2021.7 | 12.3 | 2869 | -0.53  | NAN   | -0.2  | 0.6   | TxDOT       |
| TXEX | -95.119 | 29.564 | 2010.9 | 2021.7 | 10.8 | 3574 | 3.38   | NAN   | 3.7   | 2.4   | HGSD        |
| TXGA | -94.773 | 29.328 | 2005.6 | 2021.7 | 16.2 | 5690 | -2.33  | -4.7  | -3    | -2    | TxDOT       |
| TXGV | -94.789 | 29.285 | 2007.1 | 2011.5 | 4.4  | 1268 | 0.47   | 1     | NAN   | NAN   | TxDOT       |
| TXHD | -94.391 | 29.563 | 2016.1 | 2021.7 | 5.6  | 1805 | 0.15   | NAN   | 0.1   | 0.1   | SmartNet    |
| TXHE | -96.063 | 30.099 | 2005.6 | 2021.7 | 16.2 | 5866 | -3.07  | -5    | -6    | -4    | TxDOT       |
| TXHN | -95.596 | 30.742 | 2010.6 | 2021.8 | 11.2 | 3762 | 0.91   | NAN   | -0.5  | -0.3  | TxDOT       |
| TXHS | -95.556 | 29.716 | 2012.5 | 2021.1 | 8.6  | 2937 | -4.77  | NAN   | -6.7  | -4.5  | SmartNet&UH |
| TXHU | -95.433 | 29.779 | 1996.1 | 2008.0 | 11.8 | 2722 | -4.53  | -2.9  | NAN   | NAN   | TxDOT       |
| TXHV | -95.553 | 30.721 | 2015.5 | 2021.8 | 6.3  | 2273 | 1.41   | NAN   | 2     | 2     | SmartNet    |
| TXKO | -94.332 | 30.395 | 2011.8 | 2021.7 | 10.0 | 3592 | -0.02  | NAN   | 0.3   | 1     | TxDOT       |
| TXKY | -95.829 | 29.822 | 2012.5 | 2017.2 | 4.8  | 1580 | -5.36  | NAN   | -10.9 | NAN   | SmartNet    |
| TXLI | -94.771 | 30.056 | 2005.6 | 2021.7 | 16.2 | 5821 | 2.32   | 1.1   | 0.8   | 1     | TxDOT       |
| TXLM | -95.024 | 29.392 | 2005.6 | 2021.7 | 16.2 | 5858 | -2.75  | -3.1  | -2    | -1    | TxDOT       |
| TXLQ | -94.953 | 29.358 | 2013.1 | 2021.7 | 8.7  | 3072 | 0.27   | NAN   | 0.2   | 0.5   | SmartNet&UH |

|      |         |        |        |        |      |      |       |       |       |       |             |
|------|---------|--------|--------|--------|------|------|-------|-------|-------|-------|-------------|
| TXMG | -95.964 | 28.983 | 2013.3 | 2021.7 | 8.4  | 2685 | -2.22 | NAN   | -2.3  | -1.3  | SmartNet&UH |
| TXNV | -96.067 | 30.382 | 2012.5 | 2021.7 | 9.3  | 3315 | -2.81 | NAN   | -3.1  | -2.1  | SmartNet    |
| TXP5 | -95.042 | 29.668 | 2019.2 | 2021.7 | 2.6  | 800  | 0.68  | NAN   | 1.3   | 1.3   | SmartNet    |
| TXPH | -93.945 | 29.914 | 2015.3 | 2021.8 | 6.5  | 2294 | -0.84 | NAN   | -1    | -0.9  | SmartNet    |
| TXPT | -93.953 | 29.947 | 2011.3 | 2021.8 | 10.5 | 3813 | 0.86  | NAN   | -2.2  | -1.7  | TxDOT       |
| TXPV | -96.619 | 28.638 | 2010.3 | 2021.7 | 11.4 | 4148 | 1.21  | NAN   | 0.2   | 1.8   | TxDOT       |
| TXRN | -95.829 | 29.543 | 2015.2 | 2021.7 | 6.5  | 2342 | -0.85 | NAN   | -1.1  | -0.6  | SmartNet    |
| TXRO | -95.807 | 29.519 | 2005.6 | 2011.4 | 5.9  | 2125 | -6.62 | -14.6 | NAN   | NAN   | TxDOT       |
| TXRS | -95.805 | 29.519 | 2011.4 | 2021.7 | 10.3 | 3707 | 1.53  | NAN   | -3    | -3    | TxDOT       |
| TXSP | -93.897 | 29.731 | 2016.5 | 2021.8 | 5.4  | 1687 | 0.26  | NAN   | 0.01  | 0.1   | SmartNet    |
| TXTG | -95.297 | 29.898 | 2015.5 | 2021.7 | 6.3  | 2225 | -1.94 | NAN   | -2.7  | -2.5  | SmartNet&UH |
| TXVA | -96.910 | 28.835 | 2005.1 | 2021.8 | 16.7 | 5926 | 1.11  | 1.5   | 1     | 0.6   | TxDOT       |
| TXVC | -96.958 | 28.834 | 2015.3 | 2021.8 | 6.5  | 2331 | -0.38 | NAN   | 1.3   | 1.3   | SmartNet    |
| TXWH | -96.112 | 29.325 | 2010.4 | 2021.7 | 11.3 | 4074 | -1.41 | NAN   | -3.1  | -2    | TxDOT       |
| TXWI | -94.371 | 29.806 | 2015.5 | 2021.7 | 6.3  | 2095 | -1.51 | NAN   | -3.2  | -3    | SmartNet    |
| TXWN | -96.092 | 29.329 | 2015.0 | 2021.7 | 6.7  | 2402 | 0.22  | NAN   | -0.2  | 0.2   | SmartNet&UH |
| UH01 | -95.345 | 29.722 | 2012.7 | 2020.1 | 7.3  | 2589 | 0.14  | NAN   | -0.9  | -1.5  | UH          |
| UH02 | -95.457 | 30.315 | 2015.0 | 2021.7 | 6.7  | 2291 | -4.06 | NAN   | -6.3  | -6.4  | UH&SmartNet |
| UHC0 | -95.044 | 29.390 | 2014.1 | 2021.7 | 7.6  | 2645 | -3.39 | NAN   | -5.8  | -5.9  | UH          |
| UHC1 | -95.044 | 29.390 | 2014.1 | 2021.7 | 7.6  | 2710 | -2.08 | NAN   | -2.7  | -2    | UH          |
| UHC2 | -95.044 | 29.390 | 2014.1 | 2021.7 | 7.6  | 2709 | -2.49 | NAN   | -3    | -2.1  | UH          |
| UHC3 | -95.044 | 29.390 | 2014.2 | 2021.7 | 7.6  | 2597 | -3.81 | NAN   | -4.5  | -3.5  | UH          |
| UHCL | -95.104 | 29.578 | 2014.2 | 2021.7 | 7.5  | 2529 | 0.21  | NAN   | 0.6   | 1     | UH          |
| UHCR | -95.757 | 29.728 | 2014.1 | 2021.6 | 7.4  | 2717 | -7.60 | NAN   | -10.9 | -11.3 | UH          |
| UHDT | -95.359 | 29.766 | 2013.6 | 2021.7 | 8.2  | 2984 | -0.02 | NAN   | -1    | -0.4  | UH          |
| UHEB | -96.066 | 29.526 | 2014.6 | 2021.7 | 7.1  | 2306 | -1.22 | NAN   | -0.7  | -0.1  | UH          |
| UHEP | -95.327 | 29.719 | 2014.4 | 2021.7 | 7.3  | 2628 | -0.62 | NAN   | -1.1  | -0.2  | UH          |
| UHF1 | -95.483 | 30.236 | 2014.4 | 2021.5 | 7.1  | 2344 | -5.22 | NAN   | -5.8  | -5.4  | UH          |
| UHJF | -95.483 | 30.236 | 2014.4 | 2021.5 | 7.1  | 2049 | -4.27 | NAN   | -4.5  | -4.8  | UH          |
| UHKD | -95.748 | 29.724 | 2019.0 | 2021.7 | 2.7  | 879  | -2.27 | NAN   | -6.2  | -6.2  | UH          |
| UHKS | -95.748 | 29.724 | 2018.4 | 2021.7 | 3.3  | 1156 | -1.74 | NAN   | -5.5  | -5.5  | UH          |
| UHL1 | -94.978 | 30.058 | 2014.4 | 2021.1 | 6.8  | 2357 | 1.72  | NAN   | 1.1   | -0.3  | UH          |
| UHRI | -95.403 | 29.719 | 2014.3 | 2021.7 | 7.4  | 2691 | -1.72 | NAN   | -2.3  | -0.8  | UH          |
| UHSL | -95.652 | 29.575 | 2014.2 | 2021.7 | 7.5  | 2544 | -1.72 | NAN   | -2.9  | -2.4  | UH          |
| UHWL | -94.978 | 30.058 | 2014.4 | 2021.1 | 6.8  | 2105 | -0.59 | NAN   | -1.2  | -0.9  | UH          |
| UTEX | -95.568 | 29.786 | 2012.5 | 2021.6 | 9.1  | 3120 | -5.32 | NAN   | -7    | -4.8  | UH          |
| WCHT | -95.581 | 29.783 | 2013.3 | 2021.7 | 8.4  | 2970 | -7.10 | NAN   | -8    | -5.9  | UH          |
| WDVW | -95.533 | 29.790 | 2013.3 | 2021.7 | 8.4  | 3009 | -4.75 | NAN   | -5.5  | -4.5  | UH          |
| WEPD | -95.229 | 29.688 | 2014.1 | 2021.7 | 7.7  | 2712 | 1.46  | NAN   | 1.5   | 1.2   | UH          |
| WHCR | -95.505 | 30.194 | 2014.8 | 2021.7 | 7.0  | 2538 | -4.26 | NAN   | -6.2  | -7.1  | UH          |
| YORS | -95.469 | 30.110 | 2020.8 | 2021.7 | 0.9  | 315  | 0.06  | NAN   | NAN   | NAN   | HGSD        |
| ZHU1 | -95.331 | 29.962 | 2003.3 | 2021.7 | 18.4 | 6478 | -6.67 | -5.3  | -7.4  | -5.4  | FAA         |

\* The vertical displacement occurred during the entire observational time span of the station.

\*\* HGSD: Harris-Galveston Subsidence District; FBSD: Fort Bend Subsidence District; LSGCD: Lone Star Groundwater Conservation District; BCGCD: Brazoria County Groundwater Conservation District; UH: University of Houston; SmartNet: SmartNet North America; USCG: U.S. Coastal Guard; COH: City of Houston; USF: University of South Florida; LCRA: Lower Colorado River Authority; NOAA: National Oceanic and Atmospheric Administration; RODS: RODS Surveying Inc.; TXAM: Texas A&M University; TxDOT: Texas Department of Transportation; FAA: Federal Aviation Administration.
